# Supplementary material for: The SHED Index: A Validation Study to Assess Sustainable HEalthy Diets in Portugal
Source: MDPI journal article supplement (doi:10.3390/nu15245071), 2023-12-12
Supplement: s1 [file s1]

## Supplemental Materials

Table S1. Cronbach's alpha and item-total correlation.

|                                 | Corrected Item-Total<br>Correlation | Cronbach's Alpha if Item<br>Deleted | Global Cronbach's<br>Alpha |
|---------------------------------|-------------------------------------|-------------------------------------|----------------------------|
| <b>Healthy eating score</b>     |                                     |                                     | 0.820                      |
| healthy.eat.1                   | 0.381                               | 0.818                               |                            |
| healthy.eat.2                   | 0.477                               | 0.807                               |                            |
| healthy.eat.3                   | 0.495                               | 0.805                               |                            |
| healthy.eat.4                   | 0.533                               | 0.801                               |                            |
| healthy.eat.5                   | 0.535                               | 0.800                               |                            |
| healthy.eat.6                   | 0.530                               | 0.801                               |                            |
| healthy.eat.7                   | 0.373                               | 0.816                               |                            |
| healthy.eat.8                   | 0.635                               | 0.790                               |                            |
| healthy.eat.9                   | 0.496                               | 0.805                               |                            |
| healthy.eat.10                  | 0.591                               | 0.795                               |                            |
| <b>Sustainable eating score</b> |                                     |                                     | 0.704                      |
| sustainable.eating.1            | 0.334                               | 0.699                               |                            |
| sustainable.eating.2            | 0.460                               | 0.659                               |                            |
| sustainable.eating.3            | 0.419                               | 0.669                               |                            |
| sustainable.eating.4            | 0.525                               | 0.641                               |                            |
| sustainable.eating.5            | 0.529                               | 0.640                               |                            |
| sustainable.eating.6            | 0.364                               | 0.684                               |                            |
| sustainable.eating.7            | 0.302                               | 0.698                               |                            |
| <b>BFV location score</b>       |                                     |                                     | 0.477                      |
| Fruits.vegetables.1             | 0.186                               | 0.458                               |                            |
| Fruits.vegetables.2             | 0.203                               | 0.447                               |                            |
| Fruits.vegetables.3             | 0.166                               | 0.461                               |                            |
| Fruits.vegetables.4             | 0.196                               | 0.452                               |                            |
| Fruits.vegetables.5             | 0.361                               | 0.372                               |                            |
| Fruits.vegetables.6             | 0.380                               | 0.374                               |                            |
| Fruits.vegetables.7             | 0.250                               | 0.441                               |                            |
| Fruits.vegetables.8             | 0.015                               | 0.520                               |                            |
| <b>Ready-meals score</b>        |                                     |                                     | 0.432                      |
| ready.meals.1                   | 0.298                               | 0.340                               |                            |
| ready.meals.2                   | 0.230                               | 0.378                               |                            |
| ready.meals.3                   | 0.215                               | 0.386                               |                            |
| ready.meals.4                   | 0.203                               | 0.395                               |                            |
| ready.meals.5                   | 0.182                               | 0.404                               |                            |
| ready.meals.6                   | 0.154                               | 0.427                               |                            |
| <b>Water score</b>              |                                     |                                     | 0.409                      |
| Water.1                         | 0.279                               | 0.292                               |                            |
| Water.2                         | 0.048                               | 0.498                               |                            |
| Water.3                         | 0.140                               | 0.405                               |                            |
| Water.4                         | 0.502                               | 0.080                               |                            |
| Water.5                         | 0.144                               | 0.399                               |                            |
| <b>Sodas score</b>              |                                     |                                     | 0.471                      |
| Soft.drinks.1                   | 0.298                               | 0.369                               |                            |
| Soft.drinks.2                   | 0.266                               | 0.435                               |                            |

|                                               |       |       |
|-----------------------------------------------|-------|-------|
| Soft.drinks.3                                 | 0.358 | 0.329 |
| BFV—fruits and vegetable purchasing location. |       |       |
